# Supplementary material for: Trannulenes: a new class of photoactive materials for organic photovoltaic devices
Source: Royal Society of Chemistry journal article supplement (doi:10.1039/b908377d), 2009-01-01
Supplement: b908377d.pdf [file b908377d.pdf]

## Electronic supplementary information

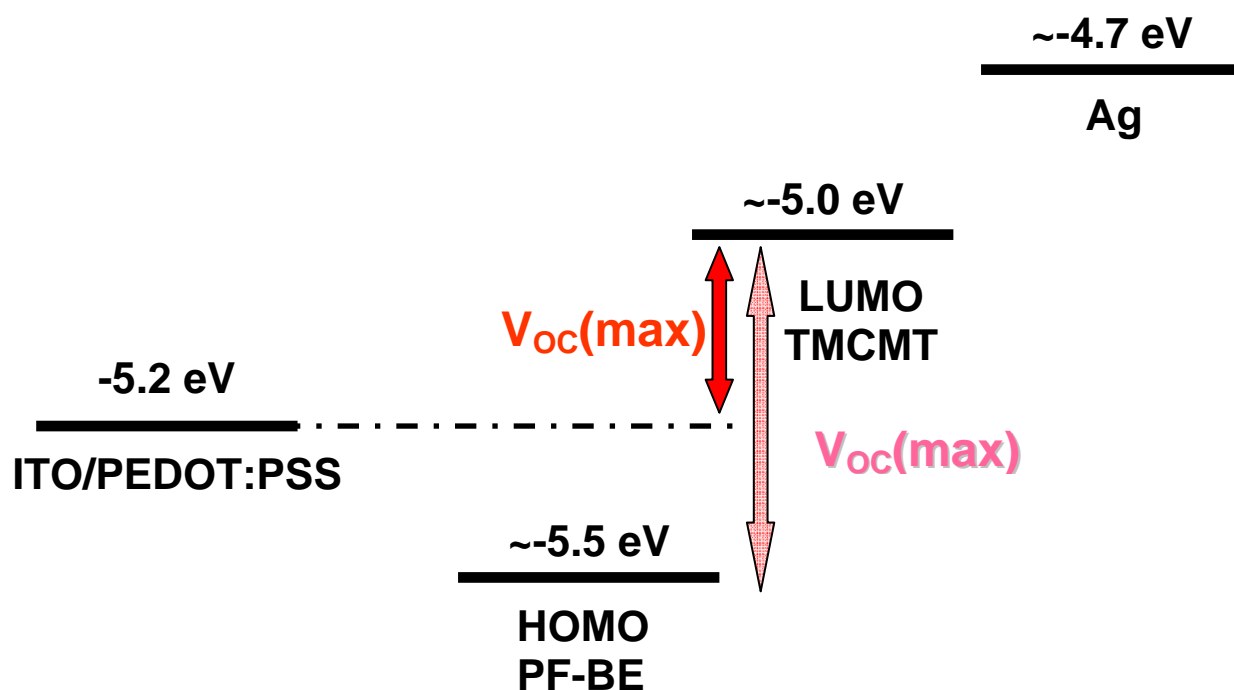

Figure S1. Energy level diagram for the ITO/PEDOT:PSS/PF-BE/TMCMT/Ag system

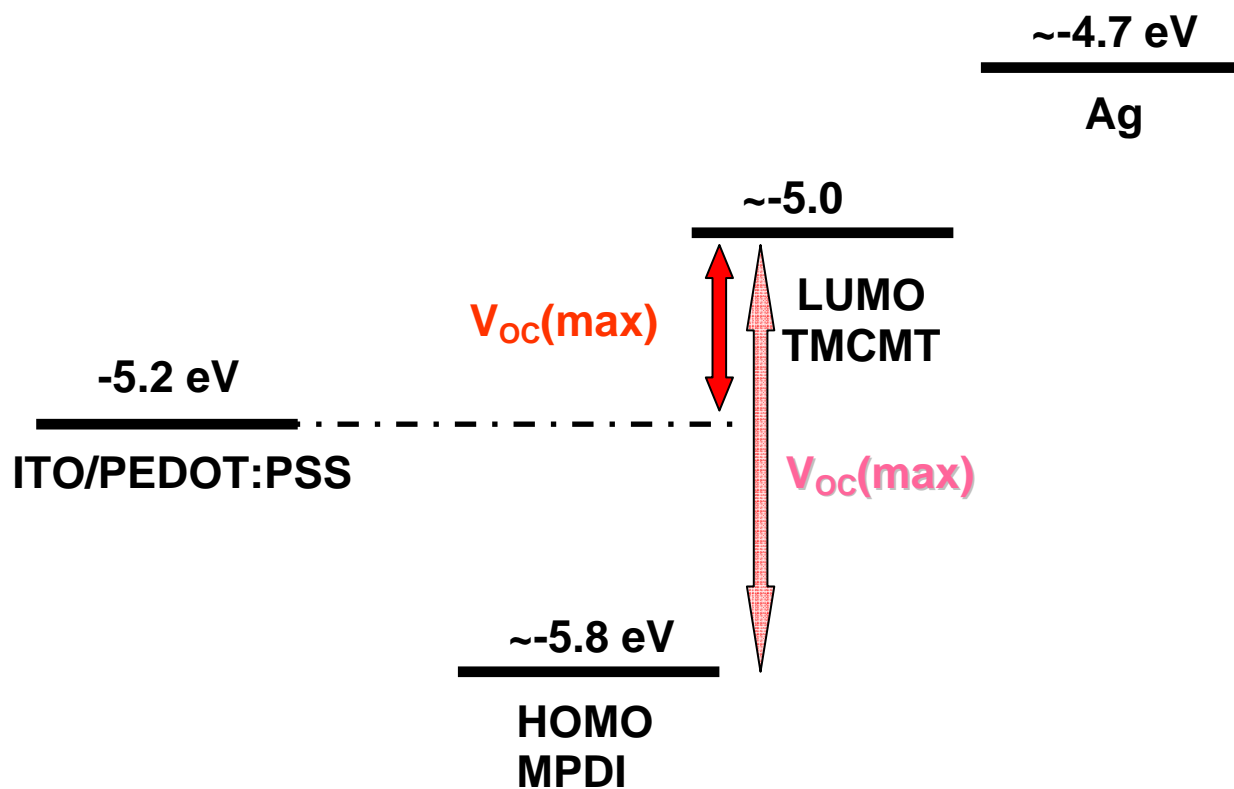

Figure S2. Energy level diagram for the ITO/PEDOT:PSS/MPDI/TMCMT/Ag system

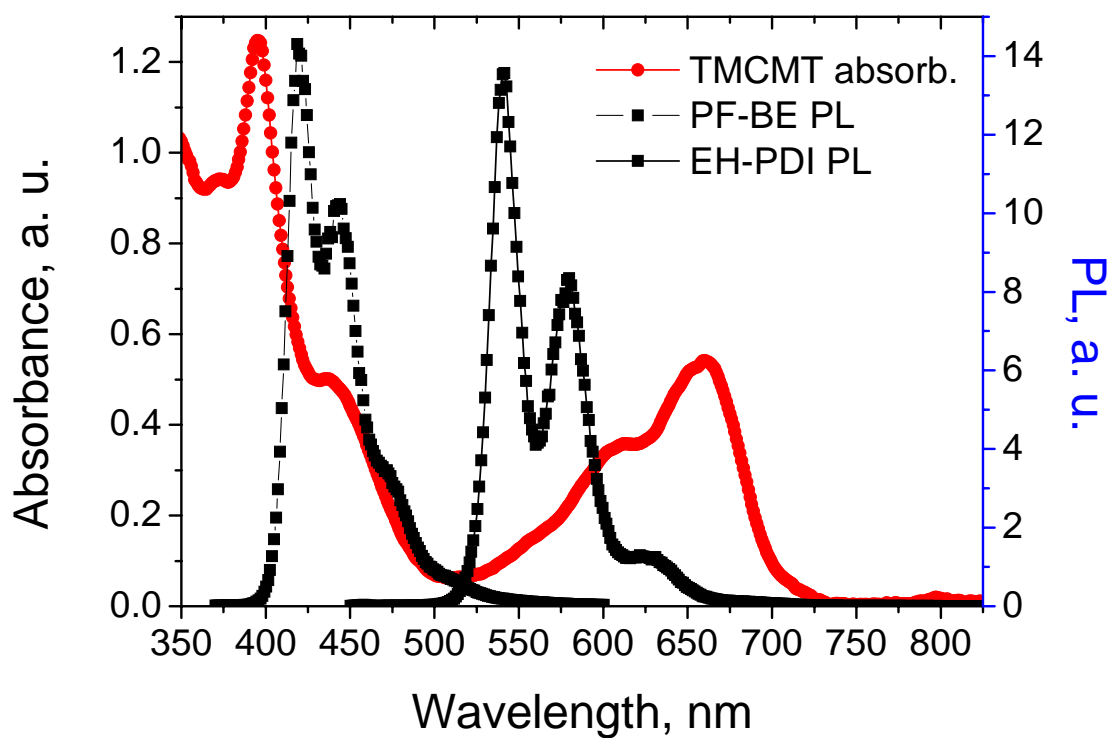

Figure S3. Absorption (TMCMT) and PL (PF-BE, EH-PDI) spectra of the materials measured in dichloromethane

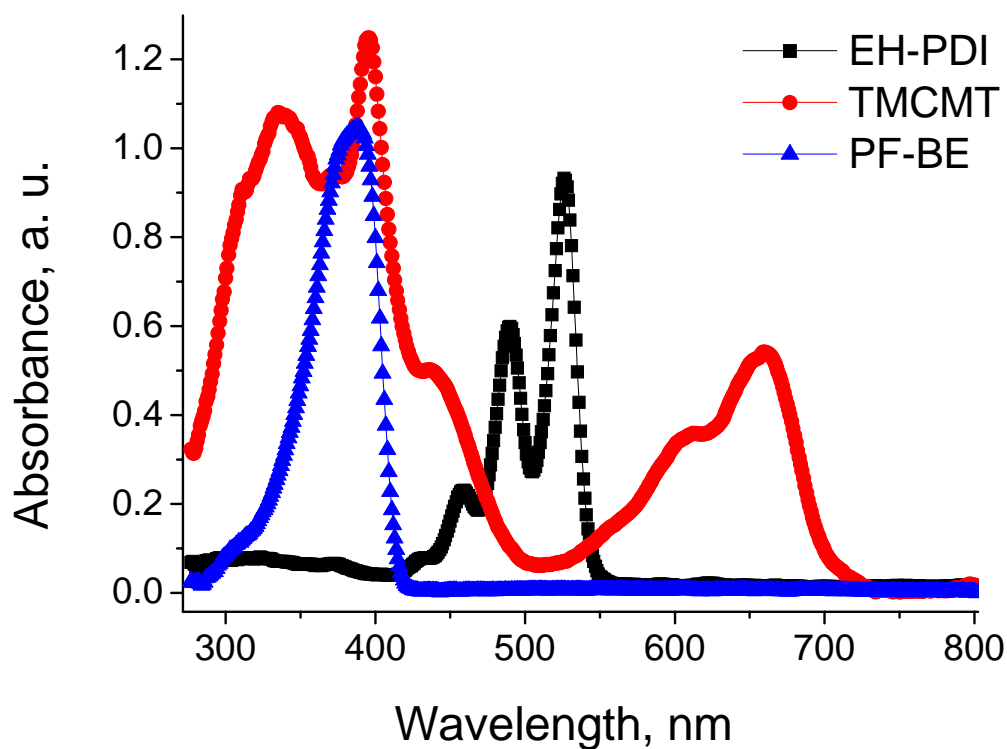

Figure S4. Absorption spectra of the materials measured in dichloromethane
